# Supplementary material for: Impact of frailty in surgical emergencies. A comparison of four frailty scales
Source: Springer Nature journal article supplement (doi:10.1007/s00068-020-01314-3), 2020-02-08
Supplement: MOESM1 [file 17662174]

CÁLCULO DE TAMAÑO MUESTRAL. (openepi)

Nivel de Confianza: 95% de IC (estándar)

Potencia (probabilidad de detección): 80% (estándar)

Razón de no expuestos a expuestos: 1.5

Predecir incidencia de pacientes frágiles acorde a la literatura:

Linda P Fried calcula que el 50% de la población> 65 años son frágiles.

En literatura quirúrgica se mencionan 40% de fragilidad (10% frágiles+ 30% pre-frágiles)frente a 60% de no frágiles.

Por cada expuesto, habría 1.5 no expuestos.

Por cada frágil, habría 1.5 no frágiles

Calculo de porcentajes no expuestos positivos – incidencia de complicaciones en no frágiles.

Siguiendo artículos que definan la Clasificación de Clavien Dindo, en torno a 25%

Predecir frecuencia de complicaciones en pacientes fragiiles

El articulo de Dindo de Ann of surgery 2004 exponiendo clasificación de Clavien Dindo habla de aumento de estancia hospitalaria pero no de tipos de cirugía e incidencia de complicaciones.

Ari Leppaniemi presenta en 2014 un trabajo de Clasificación de complicaciones postquirúrgicas según Clavien-Dindo Clas., en 444 pacientes ocurren 25,9% de complicaciones, 3,2% son tipo IV (riesgo vital o necesidad de UCI)

Especifica: infección intraabdominal no complicada 🡪 211 pacientes (47%), obstrucción intestinal 50 (11,7%), peritonitis 48 (10,8%), hernia incarcerada 34 (7,7%), exploraciones diagnósticas (no diagnósticp previo) 32 (7,2%), extraabdominal infection (17 (3,8%)), pancreatitis 11 (2,5%), trauma 9 (2%), isquemia mesentérica 5 (1,1%).

De estas intervenciones de urgencias, fueron 145 apendicectomías (32,5%), 55 cole lap (12,4%), resección colónica en 43 casos (9,7%), 37 aapendicectomías (8,3%), colecistectomías abierta en 14 (3,2%), absceso perianal 14 (3,2%), hernia inguinal 12 (2,7%), laparotomía explorador a 12 (2,7%)

Slankamenak Int J colorectal Dis 2017. EN cirugía colorrectal electiva complicaciones en 37%

Cálculo del odd ratio esperado:

Revenig et al. Journal of EndoUrology 2014: Complicaciones en fragiles 38,5% comparado con 11.9% en no fragiles. Problema, solo un 15% eran cirugías de cirugía general, resto era deuro.

Farhat et al AAST 2011. Más de 35.000 pacientes, ultizando MFI para estratificar fragilidad, demuestra una OddRatio de 11,7!! En relación a complicaciones frágil Vs no frágil. Todas cirugías de urgencias, pero en mayores de 60 años.

MAkary y Linda P Fried en 2010 destacan OR de compliaciones 2.06 en prefragiles y 2.54 en frágiles. Se incluyen en este caso 654 pacientes que se realizan cirugía electiva. Interesante que incluyen la escala validada de 5 items que es fácil de hacer.

Hewitt et al. Am J Surg 2015. 325 pacientes > 77 años, dividiendo en tres grados de fragilidad, con OR de 4 en cuanto a probabilidad de fallecer. 25 % de fragilidad, diferente a otros.

Robinson et al. Am J Surg 2013. 201 paciente > 74 años, OR 5,2

Cálculo Muestral si OR 2.5

| **Tamaño muestral: transversal, de cohorte, y ensayo clínico** | | | | | |
| --- | --- | --- | --- | --- | --- |
| Nivel de significación de dos lados(1-alpha) | | | | 95 |  |
| Potencia (1-beta,% probabilidad de detección) | | | | 80 |  |
| Razón de tamaño de la muestra, Expuesto/No Expuesto | | | | 1.5 |  |
| Porcentaje de No Expuestos positivos | | | | 26 |  |
| Porcentaje de Expuestos positivos | | | | 47 |  |
| Odds Ratio: | | | | 2.5 |  |
| Razón de riesgo/prevalencia | | | | 1.8 |  |
| Diferencia riesgo/prevalencia | | | | 21 |  |
|  | | | | | |
|  | | **Kelsey** | **Fleiss** | **Fleiss con CC** |  |
|  | | | | | |
| Tamaño de la muestra - Expuestos | | 69 | 69 | 77 |  |
| Tamaño de la muestra- No expuestos | | 103 | 103 | 115 |  |
|  | | | | | |
| Tamaño total de la muestra | | 172 | 172 | 192 |  |
|  |  |  |  |  |  |

Cálculo muestral si OR 3.5

| **Tamaño muestral: transversal, de cohorte, y ensayo clínico** | | | | | |
| --- | --- | --- | --- | --- | --- |
| Nivel de significación de dos lados(1-alpha) | | | | 95 |  |
| Potencia (1-beta,% probabilidad de detección) | | | | 80 |  |
| Razón de tamaño de la muestra, Expuesto/No Expuesto | | | | 1.5 |  |
| Porcentaje de No Expuestos positivos | | | | 26 |  |
| Porcentaje de Expuestos positivos | | | | 55 |  |
| Odds Ratio: | | | | 3.5 |  |
| Razón de riesgo/prevalencia | | | | 2.1 |  |
| Diferencia riesgo/prevalencia | | | | 29 |  |
|  | | | | | |
|  | | **Kelsey** | **Fleiss** | **Fleiss con CC** |  |
|  | | | | | |
| Tamaño de la muestra - Expuestos | | 37 | 36 | 42 |  |
| Tamaño de la muestra- No expuestos | | 55 | 54 | 62 |  |
|  | | | | | |
| Tamaño total de la muestra | | 92 | 90 | 104 |  |
|  |  |  |  |  |  |
